# Supplementary material for: Interaction between Genetic Risks and Socioeconomic Factors on Thyroid Cancer: Evidence from 0.5 Million UK Biobank Participants
Source: MDPI journal article supplement (doi:10.3390/cancers15205028), 2023-10-18
Supplement: s1 [file s1]

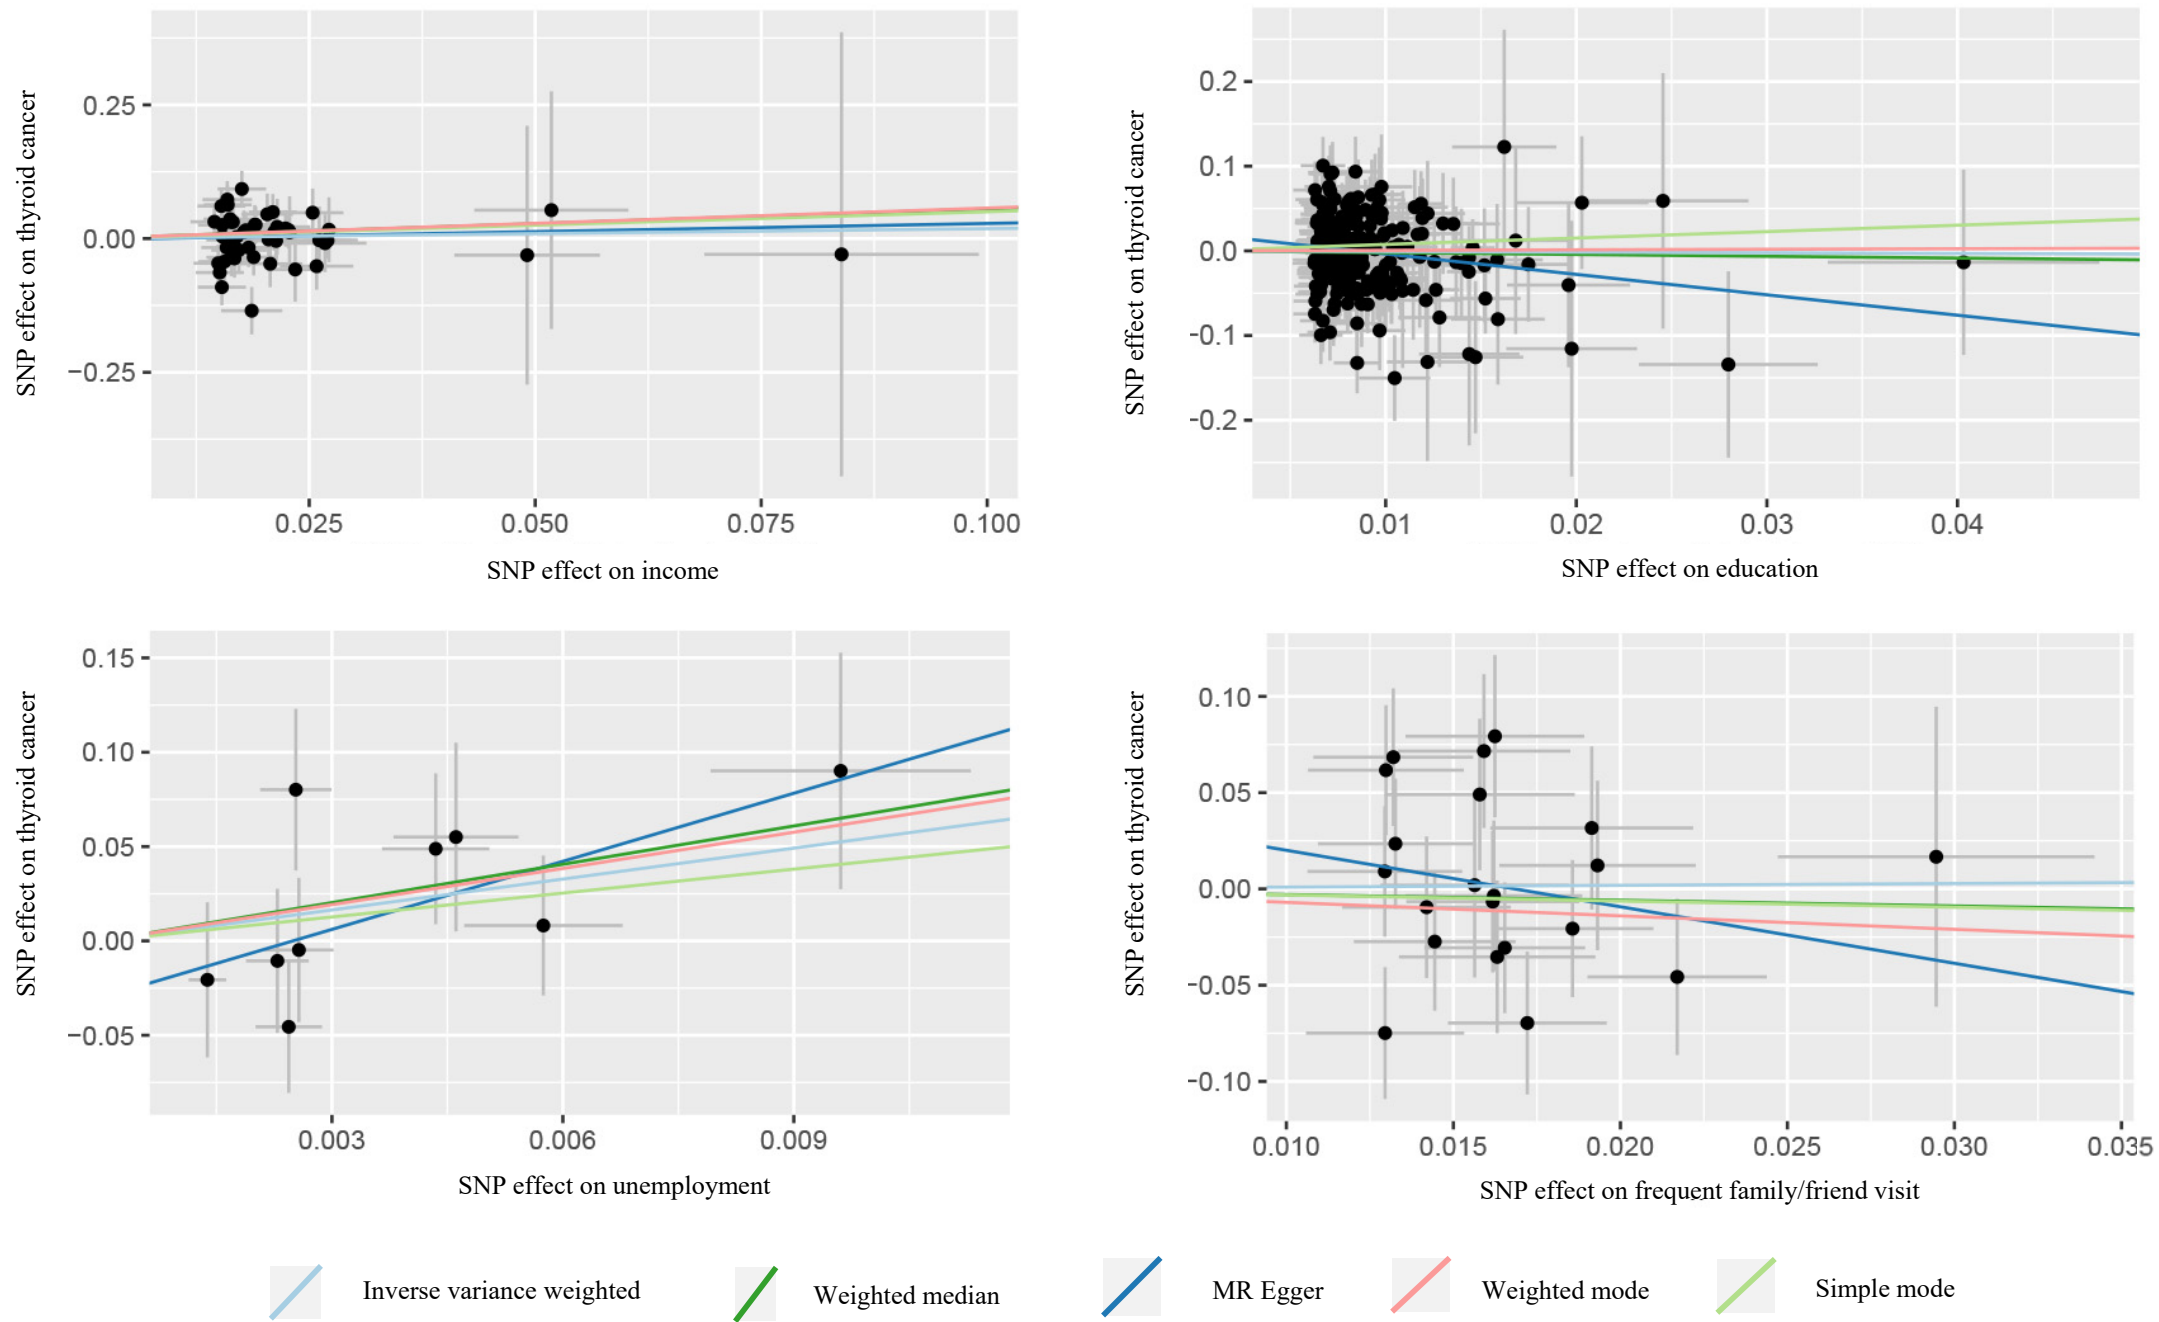

**Figure S1.** Scatter plots of the four socioeconomic traits in relation to thyroid cancer

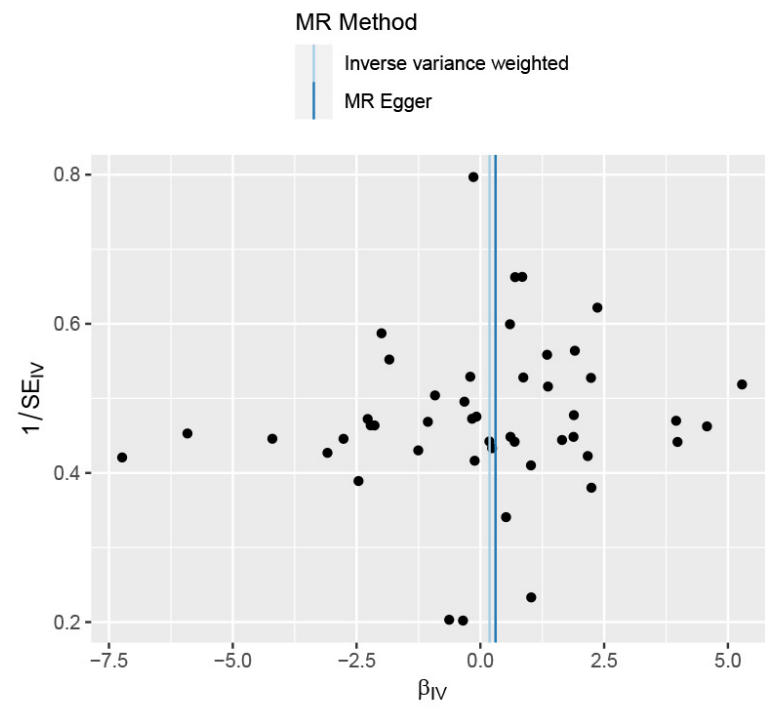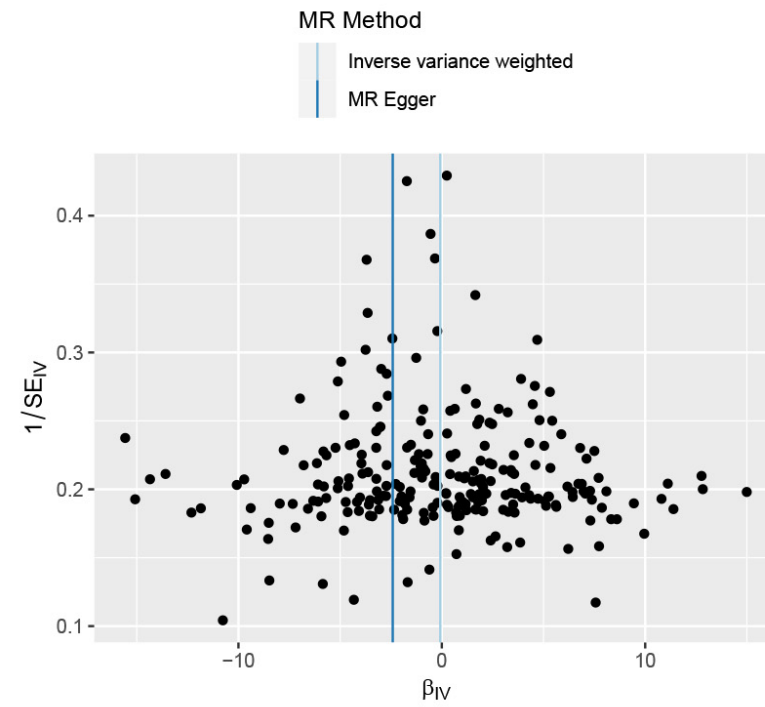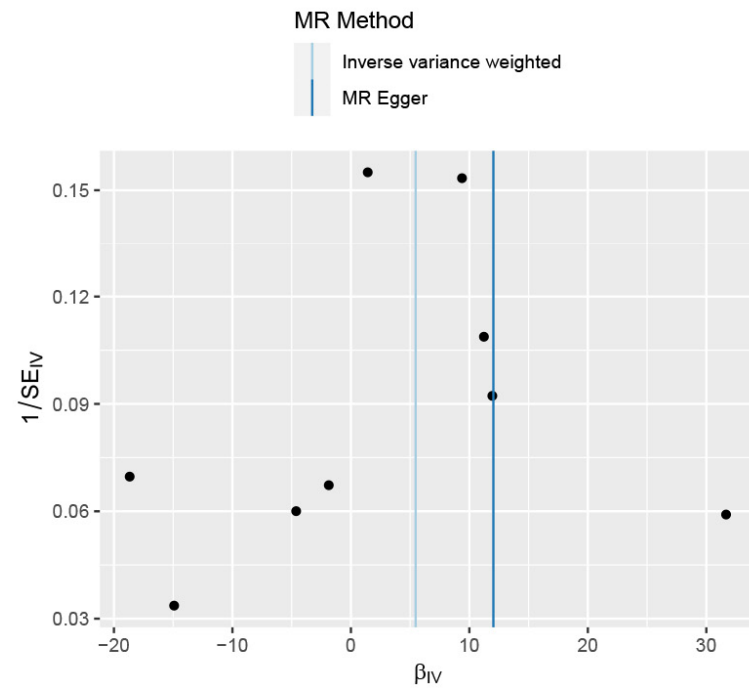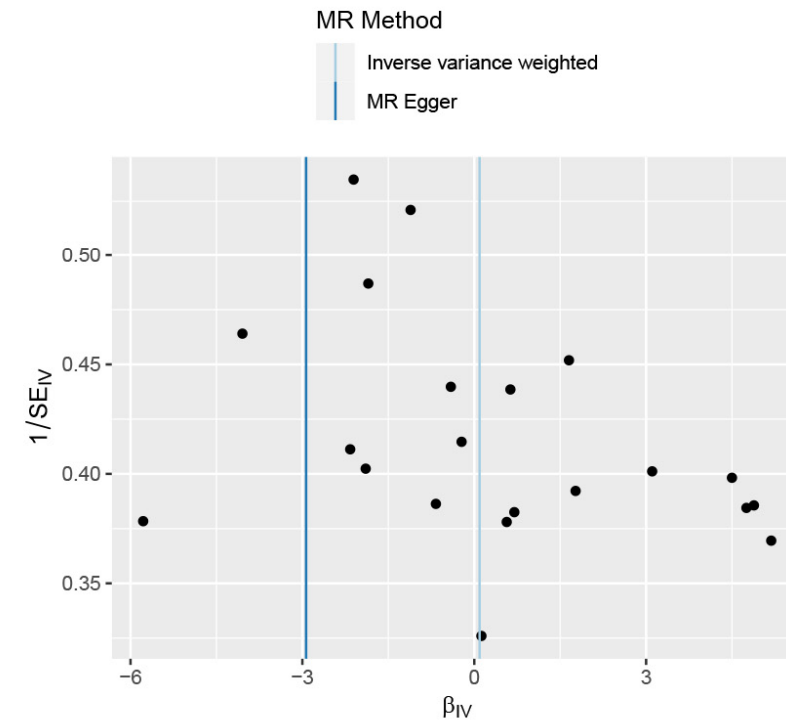

**Figure S2.** Funnel plots of each single nucleotide polymorphism of the four socioeconomic traits in relation to thyroid cancer
