# Supplementary material for: Interaction between Genetic Risks and Socioeconomic Factors on Thyroid Cancer: Evidence from 0.5 Million UK Biobank Participants
Source: MDPI journal article supplement (doi:10.3390/cancers15205028), 2023-10-18
Supplement: s1 [file s1]

Table S1. Missingness of variables of interest in this study (n, %)

|                                   | <b>Cases</b><br><b>(n=1026)</b> | <b>Controls</b><br><b>(n=501,368)</b> |
|-----------------------------------|---------------------------------|---------------------------------------|
| Age                               | 0 (0.0)                         | 0 (0.0)                               |
| Sex                               | 0 (0.0)                         | 0 (0.0)                               |
| Ethnicity                         | 2 (0.2)                         | 892 (0.2)                             |
| Annual household income           | 10 (1.0)                        | 6,004 (1.2)                           |
| Education level                   | 9 (0.9)                         | 4,633 (0.9)                           |
| Employment status                 | 2 (0.2)                         | 870 (0.2)                             |
| Household size                    | 3 (0.3)                         | 2,258 (0.5)                           |
| Frequency of friend/family visits | 9 (0.9)                         | 4,645 (0.9)                           |
| Frequency of confiding in others  | 9 (0.9)                         | 912 (0.2)                             |

Table S2. Association results from latest genome-wide association studies for previously reported thyroid cancer risk loci in European ancestry

| <b>SNP</b>  | <b>Locus</b> | <b>Effect allele</b> | <b>OR</b> | <b>LCI</b> | <b>UCI</b> | <b>P value</b>         |
|-------------|--------------|----------------------|-----------|------------|------------|------------------------|
| rs12129938  | 1q42.2       | A                    | 1.32      | 1.20       | 1.43       | 4.00×10 <sup>-11</sup> |
| rs11693806  | 2q35         | C                    | 1.43      | 1.33       | 1.54       | 1.50×10 <sup>-24</sup> |
| rs966423    | 2q35         | C                    | 1.28      | 1.20       | 1.37       | 8.30×10 <sup>-15</sup> |
| rs6759952   | 2q35         | T                    | 1.25      | 1.16       | 1.34       | 6.40×10 <sup>-10</sup> |
| rs6793295   | 3q26.2       | T                    | 1.23      | 1.15       | 1.33       | 2.70×10 <sup>-08</sup> |
| rs10069690  | 5p15.33      | T                    | 1.20      | 1.12       | 1.29       | 3.20×10 <sup>-07</sup> |
| rs73227498  | 5q22.1       | A                    | 1.37      | 1.23       | 1.49       | 3.00×10 <sup>-10</sup> |
| rs2466076   | 8p12         | G                    | 1.32      | 1.23       | 1.41       | 1.50×10 <sup>-17</sup> |
| rs2439302   | 8p12         | G                    | 1.32      | 1.23       | 1.41       | 5.70×10 <sup>-17</sup> |
| rs1588635   | 9q22.33      | A                    | 1.70      | 1.59       | 1.82       | 2.00×10 <sup>-58</sup> |
| rs965513    | 9q22.33      | A                    | 1.70      | 1.59       | 1.79       | 2.20×10 <sup>-57</sup> |
| rs10122541  | 9q22.33      | G                    | 1.54      | 1.40       | 1.70       | 1.10×10 <sup>-17</sup> |
| rs7037324   | 9q22.33      | A                    | 1.54      | 1.39       | 1.70       | 1.20×10 <sup>-17</sup> |
| rs7902587   | 10q24.33     | T                    | 1.41      | 1.27       | 1.56       | 5.40×10 <sup>-11</sup> |
| rs368187    | 14q13.3      | G                    | 1.39      | 1.30       | 1.47       | 5.10×10 <sup>-23</sup> |
| rs944289    | 14q13.3      | T                    | 1.35      | 1.27       | 1.44       | 2.10×10 <sup>-19</sup> |
| rs116909374 | 14q13.3      | T                    | 1.71      | 1.47       | 2.00       | 6.20×10 <sup>-12</sup> |
| rs10136427  | 14q24.3      | C                    | 1.40      | 1.23       | 1.60       | 4.35×10 <sup>-07</sup> |
| rs2289261   | 15q22.33     | C                    | 1.23      | 1.15       | 1.32       | 3.10×10 <sup>-09</sup> |
| rs56062135  | 15q22.33     | T                    | 1.24      | 1.16       | 1.34       | 4.90×10 <sup>-09</sup> |
| rs7267944   | 20q12        | C                    | 1.39      | 1.24       | 1.56       | 2.13×10 <sup>-08</sup> |

SNP, single nucleotide polymorphism; OR, odds ratio; LCI, lower confidence interval; UCI, upper confidence interval

Table S3. Characteristics of GWAS summary data for socioeconomic factors and thyroid cancer in European ancestry

| <b>Phenotype</b>                  | <b>GWAS ID</b>                 | <b>Year</b> | <b>Sample size</b> | <b>No. SNPs</b> | <b>Author</b> | <b>Consortium</b> |
|-----------------------------------|--------------------------------|-------------|--------------------|-----------------|---------------|-------------------|
| Thyroid cancer                    | finn-b-C3_THYROID_GLAND_EXALLC | 2023        | 288,920            | 18,707,521      | NA            | FinnGen           |
| Average total household income    | ukb-b-7408                     | 2018        | 397,751            | 9,851,867       | Elsworth B    | MRC-IEU           |
| College or University degree      | ukb-a-397                      | 2017        | 334,070            | 9,851,867       | Neale         | Neale Lab         |
| Unemployed status                 | ukb-b-12885                    | 2018        | 461,242            | 9,851,867       | Elsworth B    | MRC-IEU           |
| Frequency of friend/family visits | ukb-b-5379                     | 2018        | 459,830            | 9,851,867       | Elsworth B    | MRC-IEU           |

GWAS, genome-wide association study; SNP, single nucleotide polymorphism
